# Supplementary material for: Genomics and Antimicrobial Susceptibility of Clinical Pseudomonas aeruginosa Isolates from Hospitals in Brazil
Source: MDPI journal article supplement (doi:10.3390/pathogens12070918), 2023-07-08
Supplement: s1 [file s1]

**Supplementary Table S1.** Heatmap showing the distribution of predicted serotypes according to ST.

| ST   | Predicted serotype |    |    |       |    |    |    |    |    |     |     |     | Total |
|------|--------------------|----|----|-------|----|----|----|----|----|-----|-----|-----|-------|
|      | O1                 | O2 | O3 | O3 O6 | O4 | O5 | O6 | O7 | O9 | O10 | O11 | O12 |       |
| 10   | 1                  |    |    |       |    |    |    |    |    |     |     |     | 1     |
| 111  |                    |    |    |       |    |    |    |    |    |     |     | 1   | 1     |
| 179  |                    |    |    |       |    |    | 3  |    |    |     |     |     | 3     |
| 183  |                    |    |    |       |    | 1  |    |    |    |     |     |     | 1     |
| 207  | 1                  |    |    |       |    |    |    |    |    |     |     |     | 1     |
| 234  |                    |    |    |       | 1  |    |    |    |    |     |     |     | 1     |
| 235  |                    |    |    |       |    |    |    |    |    |     | 16  |     | 16    |
| 238  | 1                  |    |    |       |    |    |    |    |    |     |     |     | 1     |
| 244  |                    |    |    |       |    | 1  |    |    |    |     |     |     | 1     |
| 252  | 3                  |    |    |       |    |    |    |    |    |     |     |     | 3     |
| 253  |                    |    |    |       |    |    |    |    |    | 1   |     |     | 1     |
| 261  |                    |    |    |       |    |    | 1  |    |    |     |     |     | 1     |
| 274  |                    |    | 7  |       |    |    |    |    |    |     |     |     | 7     |
| 277  |                    | 3  |    |       |    | 1  |    |    |    |     |     |     | 4     |
| 282  |                    |    |    |       |    |    | 1  |    |    |     |     |     | 1     |
| 309  |                    |    |    |       |    |    |    |    |    |     | 3   |     | 3     |
| 313  | 3                  |    |    |       |    |    |    |    |    |     |     |     | 3     |
| 316  |                    |    |    |       |    |    |    |    |    |     | 1   |     | 1     |
| 381  |                    | 3  |    |       |    | 1  |    |    |    |     |     |     | 4     |
| 385  |                    |    |    |       |    |    | 1  |    |    |     |     |     | 1     |
| 389  |                    |    |    |       | 2  |    |    |    |    |     |     |     | 2     |
| 446  |                    |    |    |       |    |    |    |    |    |     | 5   |     | 5     |
| 498  | 1                  |    |    |       |    |    |    |    |    |     |     |     | 1     |
| 554  |                    |    |    |       |    | 1  |    |    |    |     |     |     | 1     |
| 557  |                    |    |    |       |    |    |    | 3  |    |     |     |     | 3     |
| 591  |                    |    |    |       |    | 1  |    |    |    |     |     |     | 1     |
| 598  |                    |    |    |       |    |    |    |    | 2  |     |     |     | 2     |
| 633  |                    |    |    |       |    |    | 1  |    |    |     |     |     | 1     |
| 640  |                    |    |    |       |    |    |    |    |    |     | 1   |     | 1     |
| 644  |                    |    |    |       |    |    |    |    |    |     | 1   |     | 1     |
| 697  |                    |    |    |       |    |    |    |    |    |     | 1   |     | 1     |
| 709  |                    |    |    |       |    | 1  |    |    |    |     |     |     | 1     |
| 803  |                    |    | 1  |       |    |    |    |    |    |     |     |     | 1     |
| 875  |                    |    |    |       |    |    | 2  |    |    |     |     |     | 2     |
| 973  |                    |    |    |       |    |    |    |    |    |     | 1   |     | 1     |
| 1086 |                    |    |    |       |    |    |    | 1  |    |     |     |     | 1     |
| 1122 |                    |    |    |       |    |    |    |    |    |     | 1   |     | 1     |
| 1129 |                    |    |    |       |    |    | 1  |    |    |     |     |     | 1     |
| 1212 |                    |    |    |       |    |    |    |    |    |     | 1   |     | 1     |
| 1284 |                    |    |    |       |    |    |    |    |    |     | 1   |     | 1     |
| 1290 |                    |    |    |       |    |    |    |    | 1  |     |     |     | 1     |
| 1560 |                    |    |    |       | 1  |    |    |    |    |     |     |     | 1     |

|                    |      |     |     |       |     |     |      |     |     |     |      |     |  |       |   |
|--------------------|------|-----|-----|-------|-----|-----|------|-----|-----|-----|------|-----|--|-------|---|
| 1600               |      |     | 1   |       |     |     |      |     |     |     |      |     |  |       | 1 |
| 1717               |      |     |     |       |     |     |      | 1   |     |     |      |     |  |       | 1 |
| 1748               |      |     |     |       |     |     |      | 1   |     |     |      |     |  |       | 1 |
| 1966               |      |     |     |       |     |     |      | 1   |     |     |      |     |  |       | 1 |
| 2234               |      |     |     |       |     |     |      | 1   |     |     |      |     |  |       | 1 |
| 2238               |      |     |     |       |     |     |      | 1   |     |     |      |     |  |       | 1 |
| 2317               |      |     |     |       |     |     | 2    |     |     |     |      |     |  |       | 2 |
| 2375               | 1    |     |     |       |     |     |      |     |     |     |      |     |  |       | 1 |
| 2475               |      | 1   |     |       |     |     |      |     |     |     |      |     |  |       | 1 |
| 2524               |      |     |     |       |     |     |      |     |     |     |      | 1   |  |       | 1 |
| 2629               |      |     |     |       |     |     |      |     |     |     |      | 1   |  |       | 1 |
| 3142               |      |     |     |       |     | 1   |      |     |     |     |      |     |  |       | 1 |
| 3214               |      |     |     |       |     |     | 1    |     |     |     |      |     |  |       | 1 |
| 3267               |      |     |     |       |     |     |      | 1   |     |     |      |     |  |       | 1 |
| 3494               |      |     |     |       |     |     |      |     |     |     | 1    |     |  |       | 1 |
| 4022               |      |     |     |       |     |     |      |     |     |     |      | 1   |  |       | 1 |
| 4072               |      |     | 1   |       |     |     |      |     |     |     |      |     |  |       | 1 |
| $\Delta$ mutL      |      |     |     | 1     |     |     |      |     |     |     |      |     |  |       | 1 |
| 4083*              |      |     |     |       |     |     |      |     |     |     | 1    |     |  |       | 1 |
| 4084*              |      |     |     |       |     |     |      | 1   |     |     |      |     |  |       | 1 |
| 4085*              |      |     |     |       |     |     |      |     |     |     |      | 1   |  |       | 1 |
| 4086*              |      |     |     |       |     |     |      |     |     |     |      | 1   |  |       | 1 |
| 4087*              |      |     |     |       |     |     |      |     |     |     |      | 1   |  |       | 1 |
| 4088*              |      |     |     |       |     |     |      |     |     | 4   |      |     |  |       | 4 |
| 4089*              | 1    |     |     |       |     |     |      |     |     |     |      |     |  |       | 1 |
| 4090*              |      | 1   |     |       |     |     |      |     |     |     |      |     |  |       | 1 |
| 4113*              |      |     |     |       |     |     | 1    |     |     |     |      |     |  |       | 1 |
| 4114*              |      |     |     |       |     |     |      |     |     |     |      | 1   |  |       | 1 |
| 4115*              |      |     |     |       |     |     |      |     |     |     |      | 1   |  |       | 1 |
| Total              | 12   | 8   | 10  | 1     | 5   | 11  | 17   | 4   | 7   | 3   | 40   | 1   |  | 119   |   |
| %                  | 10.1 | 6.7 | 8.4 | 0.8   | 4.2 | 9.2 | 14.3 | 3.4 | 5.9 | 2.5 | 33.6 | 0.8 |  | 100   |   |
| Predicted serotype | O1   | O2  | O3  | O3 O6 | O4  | O5  | O6   | O7  | O9  | O10 | O11  | O12 |  | Total |   |
